# Supplementary material for: The T2 structure of polycrystalline cubic human insulin
Source: PubMed Central journal article supplement (PMC10167666; doi:10.1107/s2059798323001328), 2023-04-11
Supplement: d-79-00374-sup1.pdf [file d-79-00374-sup1.pdf]

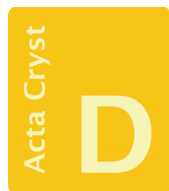

STRUCTURAL  
BIOLOGY

**Volume 79 (2023)**

**Supporting information for article:**

## **The T<sub>2</sub> structure of polycrystalline cubic human insulin**

**Dimitris P. Triandafillidis, Fotini Karavassili, Maria Spiliopoulou, Alexandros Valmas, Maria Athanasiadou, George Nikolaras, Stavroula Fili, Paraskevi Kontou, Matthew W. Bowler, Christos T. Chasapis, Robert B. Von Dreele, Andrew N. Fitch and Irene Margiolaki**

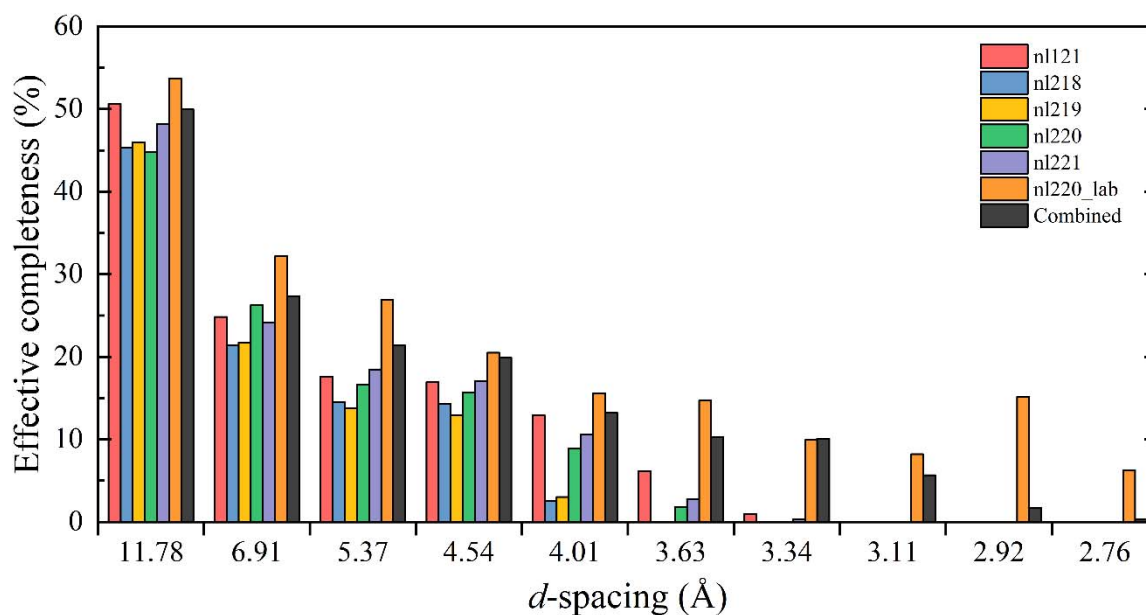

**Figure S1** Effective completeness (*i.e.* percentage of reflections with  $I/\sigma(I) > 3$ ) per resolution shell of the single and multi-profile Pawley refinements (non-structure refinement).

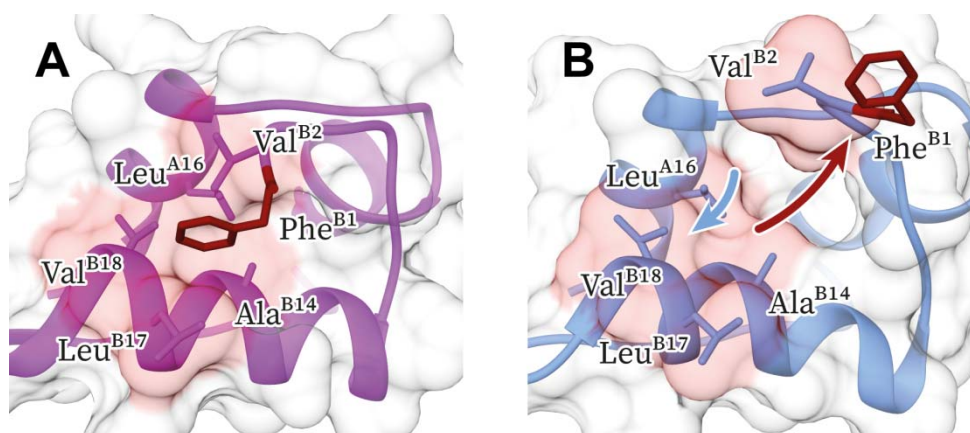

**Figure S2** Hydrophobic cavity housing PheB1 in cubic insulin structures. **A:** single-crystal cubic insulin [PDB ID: 3i40 (Timofeev *et al.*, 2010)], **B:** polycrystalline cubic insulin [PDB ID: 7qac].

**Table S1** Statistics of single- and multi-profile Pawley refinement using *PRODD* to evaluate the isomorphism of datasets, prior to structure solution and refinement

Statistics of multi-profile Rietveld refinement using *GSAS* are also shown for comparison.

| <b>Single-profile Pawley refinement (<i>PRODD</i>)</b> |              |              |              |              |              |              |
|--------------------------------------------------------|--------------|--------------|--------------|--------------|--------------|--------------|
| <b>Dataset</b>                                         | <b>nl121</b> | <b>nl218</b> | <b>nl219</b> | <b>nl220</b> | <b>nl221</b> |              |
| <b><math>R_{wp}</math> (%)</b>                         | 8.267        | 11.581       | 12.978       | 9.369        | 8.249        |              |
| <b><math>R_{exp}</math> (%)</b>                        | 5.4287       | 10.6304      | 11.5334      | 7.6802       | 6.2872       |              |
| <b><math>\chi^2</math></b>                             | 2.3192       | 1.1868       | 1.2661       | 1.4881       | 1.7213       |              |
| <b>Multi-profile Pawley refinement (<i>PRODD</i>)</b>  |              |              |              |              |              |              |
| <b>Dataset</b>                                         | <b>nl121</b> | <b>nl218</b> | <b>nl219</b> | <b>nl220</b> | <b>nl221</b> | <b>Total</b> |
| <b><math>R_{wp}</math> (%)</b>                         | 9.757        | 15.672       | 18.922       | 14.235       | 11.816       | 12.966       |
| <b><math>R_{exp}</math> (%)</b>                        | 5.3662       | 10.5326      | 11.4273      | 7.6096       | 6.2293       | 7.4824       |
| <b><math>\chi^2</math></b>                             | 3.3060       | 2.2141       | 2.7418       | 3.4993       | 3.5980       | 3.0030       |
| <b>Multi-profile Rietveld refinement (<i>GSAS</i>)</b> |              |              |              |              |              |              |
| <b>Dataset</b>                                         | <b>nl121</b> | <b>nl218</b> | <b>nl219</b> | <b>nl220</b> | <b>nl221</b> | <b>Total</b> |
| <b><math>R_{wp}</math> (%)</b>                         | 10.98        | 14.75        | 15.17        | 12.12        | 10.95        | 6.94         |
| <b><math>\chi^2</math></b>                             | - †          | - †          | - †          | - †          | - †          | 2.06‡        |

† *GSAS* does not calculate  $\chi^2$  for each dataset. ‡ Total  $\chi^2$  for a stereochemically restrained Rietveld refinement depends not only on fit quality, but also on deviations of stereochemical restraints and their respective weight factors.

**Table S2** Lattice parameters and pH values for the first crystallization series of human insulin, as extracted via Pawley refinement using *HighScore Plus*.Data were collected on beamline ID22 (ESRF) [ $\lambda = 1.29974(1) \text{ \AA}$ ] at room temperature.

| Sample | pH       |       |         | Space group              | Unit-cell parameters |              |              |              |             |              | $\chi^2$ |
|--------|----------|-------|---------|--------------------------|----------------------|--------------|--------------|--------------|-------------|--------------|----------|
|        | Starting | Final | Average |                          | <i>a</i> (Å)         | <i>b</i> (Å) | <i>c</i> (Å) | $\alpha$ (°) | $\beta$ (°) | $\gamma$ (°) |          |
| nl11   | 4.49     | 5.27  | 4.88    | <i>amorphous</i>         |                      |              |              |              |             |              |          |
| nl12   | 4.69     | 5.33  | 5.01    | <i>R3<sub>T6</sub></i>   | 82.975(2)            | 82.975(2)    | 34.0244(7)   | 90           | 90          | 120          | 1.3064   |
| nl13   | 4.89     | 5.52  | 5.21    | <i>R3<sub>T6</sub></i>   | 82.954(2)            | 82.954(2)    | 34.0358(7)   | 90           | 90          | 120          | 1.156    |
| nl14   | 5.09     | 5.71  | 5.40    | <i>R3<sub>T6</sub></i>   | 82.876(1)            | 82.876(1)    | 34.0686(5)   | 90           | 90          | 120          | 1.2675   |
| nl15   | 5.31     | 5.87  | 5.59    | <i>R3<sub>T6</sub></i>   | 82.9870(5)           | 82.9870(5)   | 34.0604(3)   | 90           | 90          | 120          | 1.4844   |
| nl16   | 5.56     | 6.07  | 5.82    | <i>R3<sub>T6</sub></i>   | 82.9869(4)           | 82.9869(4)   | 34.0734(2)   | 90           | 90          | 120          | 1.5197   |
| nl17   | 5.69     | 6.14  | 5.92    | <i>R3<sub>T6</sub></i>   | 82.9677(4)           | 82.9677(4)   | 34.0824(2)   | 90           | 90          | 120          | 1.6323   |
| nl18   | 5.92     | 6.31  | 6.12    | <i>R3<sub>T6</sub></i>   | 83.0010(5)           | 83.0010(5)   | 34.1082(2)   | 90           | 90          | 120          | 1.3772   |
| nl19   | 6.11     | 6.46  | 6.29    | <i>R3<sub>T6</sub></i>   | 83.0031(7)           | 83.0031(7)   | 34.1401(4)   | 90           | 90          | 120          | 1.366    |
| nl110  | 6.27     | 6.52  | 6.40    | <i>R3<sub>T6</sub></i>   | 82.9949(6)           | 82.9949(6)   | 34.1467(3)   | 90           | 90          | 120          | 1.4791   |
| nl111  | 6.53     | 6.76  | 6.65    | <i>R3<sub>T6</sub></i>   | 82.9320(8)           | 82.9320(8)   | 34.1600(3)   | 90           | 90          | 120          | 2.351    |
|        |          |       |         | <i>R3<sub>T3R3</sub></i> | 80.600(1)            | 80.600(1)    | 37.7022(8)   | 90           | 90          | 120          |          |
| nl112  | 6.72     | 6.82  | 6.77    | <i>R3<sub>T6</sub></i>   | 82.929(1)            | 82.929(1)    | 34.1628(4)   | 90           | 90          | 120          | 2.4265   |
|        |          |       |         | <i>R3<sub>T3R3</sub></i> | 80.598(1)            | 80.598(1)    | 37.6986(6)   | 90           | 90          | 120          |          |
| nl113  | 6.91     | 6.77  | 6.84    | <i>R3<sub>T6</sub></i>   | 82.974(1)            | 82.974(1)    | 34.1651(5)   | 90           | 90          | 120          | 2.099    |
|        |          |       |         | <i>R3<sub>T3R3</sub></i> | 80.582(2)            | 80.582(2)    | 37.6943(9)   | 90           | 90          | 120          |          |
| nl114  | 7.09     | 6.84  | 6.97    | <i>R3<sub>T3R3</sub></i> | 80.5817(6)           | 80.5817(6)   | 37.6980(3)   | 90           | 90          | 120          | 1.4038   |
| nl115  | 7.30     | 6.93  | 7.12    | <i>R3<sub>T3R3</sub></i> | 80.6179(6)           | 80.6179(6)   | 37.7079(3)   | 90           | 90          | 120          | 1.4232   |
| nl116  | 7.51     | 7.06  | 7.29    | <i>R3<sub>T3R3</sub></i> | 80.6304(6)           | 80.6304(6)   | 37.7180(3)   | 90           | 90          | 120          | 1.3602   |
| nl117  | 7.71     | 7.11  | 7.41    | <i>R3<sub>T3R3</sub></i> | 80.6461(4)           | 80.6461(4)   | 37.7373(2)   | 90           | 90          | 120          | 1.501    |
| nl118  | 7.91     | 7.21  | 7.56    | <i>R3<sub>T3R3</sub></i> | 80.6600(5)           | 80.6600(5)   | 37.7443(3)   | 90           | 90          | 120          | 1.3588   |
| nl119  | 8.11     | 7.36  | 7.74    | <i>R3<sub>T3R3</sub></i> | 80.694(3)            | 80.694(3)    | 37.759(1)    | 90           | 90          | 120          | 1.2813   |
| nl120  | 8.30     | 7.35  | 7.87    | <i>I2<sub>13</sub></i>   | 78.80(3)             | 78.80(3)     | 78.80(3)     | 90           | 90          | 90           | 1.1682   |
| nl121  | 8.69     | 8.43  | 8.56    | <i>I2<sub>13</sub></i>   | 78.9(3)              | 78.9(3)      | 78.9(3)      | 90           | 90          | 90           | 1.5327   |

**Table S3** Lattice parameters and pH values for the second crystallization series of human insulin, as extracted *via* Pawley refinement using *HighScore Plus*.Data were collected on beamline ID22 (ESRF) [ $\lambda = 1.299995(3)$  Å] at room temperature.

| Sample | pH       |       |         | Space group              | Unit-cell parameters |              |              |              |             |              | $\chi^2$ |
|--------|----------|-------|---------|--------------------------|----------------------|--------------|--------------|--------------|-------------|--------------|----------|
|        | Starting | Final | Average |                          | <i>a</i> (Å)         | <i>b</i> (Å) | <i>c</i> (Å) | $\alpha$ (°) | $\beta$ (°) | $\gamma$ (°) |          |
| nl21   | 4.42     | 5.46  | 4.94    | <i>amorphous</i>         |                      |              |              |              |             |              |          |
| nl22   | 4.64     | 5.51  | 5.08    | <i>amorphous</i>         |                      |              |              |              |             |              |          |
| nl23   | 4.80     | 5.52  | 5.16    | <i>R3<sub>T6</sub></i>   | 82.876(1)            | 82.876(1)    | 33.9976(4)   | 90           | 90          | 120          | 1.1800   |
| nl24   | 5.00     | 5.63  | 5.32    | <i>R3<sub>T6</sub></i>   | 82.674(3)            | 82.674(3)    | 34.041(1)    | 90           | 90          | 120          | 1.4300   |
| nl25   | 5.20     | 5.88  | 5.54    | <i>R3<sub>T6</sub></i>   | 82.910(1)            | 82.910(1)    | 34.0120(6)   | 90           | 90          | 120          | 1.2867   |
| nl26   | 5.43     | 6.11  | 5.77    | <i>R3<sub>T6</sub></i>   | 82.831(2)            | 82.831(2)    | 34.0660(9)   | 90           | 90          | 120          | 1.1045   |
| nl27   | 5.70     | 6.25  | 5.98    | <i>R3<sub>T6</sub></i>   | 82.892(2)            | 82.892(2)    | 34.0502(9)   | 90           | 90          | 120          | 1.1157   |
| nl28   | 5.90     | 6.42  | 6.16    | <i>R3<sub>T6</sub></i>   | 82.9160(7)           | 82.9160(7)   | 34.0599(3)   | 90           | 90          | 120          | 1.4035   |
| nl29   | 6.10     | 6.54  | 6.32    | <i>R3<sub>T6</sub></i>   | 82.8705(7)           | 82.8705(7)   | 34.1020(3)   | 90           | 90          | 120          | 1.3628   |
| nl210  | 6.31     | 6.65  | 6.48    | <i>R3<sub>T6</sub></i>   | 82.898(2)            | 82.898(2)    | 34.102(1)    | 90           | 90          | 120          | 1.2311   |
| nl211  | 6.55     | 6.84  | 6.70    | <i>R3<sub>T6</sub></i>   | 82.886(2)            | 82.886(2)    | 34.1272(9)   | 90           | 90          | 120          | 1.1997   |
| nl212  | 6.78     | 6.98  | 6.88    | <i>R3<sub>T3R3</sub></i> | 80.580(6)            | 80.580(6)    | 37.577(2)    | 90           | 90          | 120          | 1.1757   |
| nl213  | 7.03     | 7.15  | 7.09    | <i>R3<sub>T3R3</sub></i> | 80.591(4)            | 80.591(4)    | 37.612(3)    | 90           | 90          | 120          | 1.1898   |
| nl214  | 7.20     | 7.28  | 7.24    | <i>R3<sub>T3R3</sub></i> | 80.655(1)            | 80.655(1)    | 37.662(1)    | 90           | 90          | 120          | 1.1919   |
| nl215  | 7.45     | 7.47  | 7.46    | <i>I2<sub>13</sub></i>   | 78.7(2)              | 78.7(2)      | 78.7(2)      | 90           | 90          | 90           | 1.0914   |
| nl216  | 7.70     | 7.55  | 7.63    | <i>I2<sub>13</sub></i>   | 78.8(3)              | 78.8(3)      | 78.8(3)      | 90           | 90          | 90           | 1.7176   |
| nl217  | 7.86     | 7.58  | 7.72    | <i>I2<sub>13</sub></i>   | 78.8390(6)           | 78.8390(6)   | 78.8390(6)   | 90           | 90          | 90           | 1.4283   |
| nl218  | 8.06     | 7.70  | 7.88    | <i>I2<sub>13</sub></i>   | 78.8635(3)           | 78.8635(3)   | 78.8635(3)   | 90           | 90          | 90           | 1.6777   |
| nl219  | 8.30     | 7.74  | 8.02    | <i>I2<sub>13</sub></i>   | 78.8767(3)           | 78.8767(3)   | 78.8767(3)   | 90           | 90          | 90           | 1.7093   |
| nl220  | 8.50     | 7.84  | 8.17    | <i>I2<sub>13</sub></i>   | 78.8344(2)           | 78.8344(2)   | 78.8344(2)   | 90           | 90          | 90           | 2.0488   |
| nl221  | 8.70     | 7.82  | 8.26    | <i>I2<sub>13</sub></i>   | 78.9(9)              | 78.9(9)      | 78.9(9)      | 90           | 90          | 90           | 1.4176   |

**Table S4** Distances in residues of the hydrophobic core in the C-terminus of chain B and their mean distance in molecular dynamics simulations.

| PDB ID          | Distance in X-ray structure (Å) |      |      |      | Mean distance in simulations (Å) |          |          |          |
|-----------------|---------------------------------|------|------|------|----------------------------------|----------|----------|----------|
|                 | 7qac                            | 3i40 | 1mso | 1b9e | 7qac                             | 3i40     | 1mso     | 1b9e     |
| LeuB15 – PheB24 | 6.8                             | 6.7  | 6.8  | 7.1  | 7.0(1.0)                         | 6.6(1.4) | 6.3(1.8) | 6.7(2.0) |
| ValB12 – TyrB26 | 6.3                             | 7.1  | 6.9  | 7.4  | 6.5(1.9)                         | 7.4(2.0) | 6.7(2.3) | 6.9(2.5) |
| GlyB8 – Pro28   | 9.8                             | 8.8  | 9.6  | 7.4  | 9.5(2.5)                         | 8.1(2.6) | 9.3(2.9) | 7.5(3.3) |
